# Supplementary material for: 3D reconstruction of neuronal allometry and neuromuscular projections in asexual planarians using expansion tiling light sheet microscopy
Source: eLife journal article supplement (doi:10.7554/elife.101103), 2024-10-22
Supplement: fig1-figsupp1-data1 [file elife-101103-fig1-figsupp1-data1-v1.zip]

## Sheet: Fig S1T 
	ROI 1	ROI 2	ROI 3	ROI 4	ROI 5	ROI 6
automatic counting	624	725	908	1056	1230	1489
mannual counting	649	754	953	1115	1299	1559
