# Supplementary material for: 3D reconstruction of neuronal allometry and neuromuscular projections in asexual planarians using expansion tiling light sheet microscopy
Source: eLife journal article supplement (doi:10.7554/elife.101103), 2024-10-22
Supplement: fig2-data1 [file elife-101103-fig2-data1-v1.zip]

## Sheet: Fig 2D
cell number	neuron number
156617	11419
211148	16559
231405	22554
232268	17892
240692	20156
257041	20364
274300	20870
277299	21602
307405	24930
322174	25408
327646	24391
342666	28034
347958	28457
347407	27495
349538	25245
386637	24118
391352	31548
416492	31954
494439	30008
510376	29159
522330	27483
583111	35547
670127	31538
871017	31103
946607	27521
1111123	34425
1270129	39512
1510118	40073

## Sheet: Fig 2F
neuron number	brain neuron number
11419	5972
12642	5499
16559	9524
17892	8676
20156	6922
20364	10370
20870	9577
24118	9665
24391	9872
24930	8230
25245	11386
25408	9723
27483	9734
27495	9936
28034	8423
28457	13650
29159	11223
30008	10127
31548	11686
31954	11215
34425	13529
40073	16272

## Sheet: Fig 2H
Tbh+ neuron number	brain inside	branch
82	74	8
89	78	11
83	73	10
128	102	13
170	158	13
162	150	12
171	158	13
142	130	12
137	124	13
173	147	15
162	150	12
189	176	13
152	127	13
260	199	12
136	124	12
249	216	13

## Sheet: Fig 2I
	tbh+number:80-160	tbh+number160-260
	19.91	18.14
	19.54	18.75
	20.88	18.6
	17.12	18.6
	19	18.03
	18.1	19.67
	19.65	19.11
	19.9	18.53

## Sheet: Fig 2K
Gad+	VM gad+	DL gad+
63	12	51
80	18	62
108	20	88
97	30	67
117	29	88
57	13	44
74	17	57
74	16	58
71	19	52
87	20	67
111	24	87
91	36	55
98	25	73
138	25	113
