# Supplementary material for: 3D reconstruction of neuronal allometry and neuromuscular projections in asexual planarians using expansion tiling light sheet microscopy
Source: eLife journal article supplement (doi:10.7554/elife.101103), 2024-10-22
Supplement: fig2-figsupp1-data1 [file elife-101103-fig2-figsupp1-data1-v1.zip]

## Sheet: Fig S3B
homeostasis
cube root of volume μm	square root of surface area μm
550.685	1361.27
502.803	1312.42
671.81	1807.02
564.439	1468.03
605.966	1714.29
780.684	2194.61
795.701	2103.45
929.219	2512.01
931.912	2436.12
1120.39	2871.39
959.721	2629.5
1221.28	3404.68
1229.05	3307.38
1060.24	3319.7
1315.02	4070.8
445.855	1099.16
460.98	1160.58
447.025	1087.97
602.773	1554.45
568.557	1598.47
520.041	1439.95
586.504	1484.61
565.656	1454.06
758.367	1979.49
712.376	1770.51
789.513	2124.68
921.959	2359.52
830.954	2218.66
1002.52	2580.93
879.818	2336.93
1487.09	4370.59
615.348	1606.11
573.8	1434.27
644.908	1658.62
913.653	2387.04
953.776	2730.03
695.109	1880.08
759.716	2044.41
1212.35	3295.02
633.491	1784.29
1111.03	2996.6
1356.42	3969.27
1266.01	3822.6
882.821	2409.17
1198.44	3757.98

## Sheet: Fig S3C
volume(um3)	homo cell number
8.86297e+07	85535
8.93294e+07	90445
9.79592e+07	83739
1.27114e+08	106877
1.40641e+08	146313
1.66997e+08	108611
1.79825e+08	162611
1.80991e+08	154488
1.8379e+08	151713
1.88921e+08	156383
2.01749e+08	147735
2.19009e+08	129729
2.22507e+08	195356
2.33003e+08	190245
2.54227e+08	238769
2.68222e+08	261944
3.03207e+08	167554
3.3586e+08	336555
361516035	244856
4.36152e+08	297254
438483965	403679
4.75802e+08	306126
4.92128e+08	257969
5.0379e+08	301880
5.73761e+08	336282
6.8105e+08	407647
7.62682e+08	281765
8.02332e+08	386637
8.09329e+08	438881
867638484	296217
8.83965e+08	469574
1007580175	347958
1203498542	494439
1371428571	494532
1586005831	510376
1586005831	522330
1623323615	583111
1721282799	971017
1821574344	670127
3055393586	1111123
3638483965	1510118
3988338192	1270129

## Sheet: Fig S3D
length (mm)	brain volume
2.2	8.62974e+06
2.3	1.06822e+07
3.7	1.0449e+07
4.3	4.6414e+07
4.1	4.01166e+07
4.4	1.11953e+07
4.5	2.35569e+07
4.6	9.09621e+06
5.4	5.20117e+07
5.5	2.19242e+07
5.1	5.29446e+07
5.6	3.59184e+07
6.1	7.13703e+07
6.2	7.30029e+07
6.4	2.75219e+07
6.5	3.14869e+07
8.4	4.10496e+07
7.5	6.06414e+07
8.6	6.8105e+07
9.6	3.4519e+07
10.1	9.02624e+07
10.9	9.09621e+07

## Sheet: Fig S3E
volume μm3	Brain volume μm3
9060000000	370000000
12500000000	458000000
8510000000	448000000
46200000000	1990000000
39900000000	1720000000
13000000000	480000000
24000000000	1010000000
9100000000	390000000
44400000000	2230000000
30000000000	940000000
78400000000	2270000000
31900000000	1540000000
69600000000	3060000000
89000000000	3130000000
35200000000	1180000000
60500000000	1350000000
68000000000	1760000000
70100000000	2600000000
68000000000	2920000000
84500000000	1480000000
156000000000	3870000000
131000000000	3900000000

## Sheet: Fig S3F
2-6 mm	7-9 mm
0.0729103	0.0571324
0.0770317	0.0606748
0.0784237	0.0623789
0.0974655	0.0526162
0.0792247	0.0314883
0.0760846	0.0235073
0.0837419	0.0309828
0.0779015
0.0722239
0.0810982
0.0744431
0.0818114
0.0614018
0.0475561
0.0819126
0.0767218
0.0791435

## Sheet: Fig S3G
cell number	gad number
203552	57
235189	63
238769	74
263141	87
271854	80
362862	71
402979	108
553894	97
643090	111
752304	138

## Sheet: Fig S3H
cell number	Tbh number
83739	89
85535	82
90445	83
129729	128
146313	162
147735	171
151713	170
154488	142
244856	173
257969	162
297254	137
336282	152
407647	136
506810	189
523009	260

## Sheet: Fig S3I
cell number	Th number
92675	81
125346	49
125838	69
156821	87
215869	97
247590	95
314987	88
364258	76
432215	138
442318	94
506459	88
558997	112
561985	84
569851	114
642020	120

## Sheet: Fig S3J
cell number	Tph number
108611	255
106877	374
167554	576
162611	308
195356	462
306126	545
301880	930
386557	648
438881	552
618991	1202
469574	791
719209	587
368097	1217
594892	1554
616557	1403
