# Supplementary material for: 3D reconstruction of neuronal allometry and neuromuscular projections in asexual planarians using expansion tiling light sheet microscopy
Source: eLife journal article supplement (doi:10.7554/elife.101103), 2024-10-22
Supplement: fig3-data1 [file elife-101103-fig3-data1-v1.zip]

## Sheet: Fig 3D
dpa	chat+ neuron number
	replicate 1	replicate 2	replicate 3	replicate 4
0	7111	6142	6681	9009
1	6942	7019
2	12009	17239	12235	18995
3	12985	16376	12567
4	10839	11207	11525	11655
5	24999	19032	21632	21410
6	21099	22621
7	31735	27234	16889	20007
8	19660	15593	17503
9	19306	25781	25237
10	21178	25640
11	23239	26388
12	32356	22576	25275
13	49386	25509	21282	28980
14	28500	28593	41865

## Sheet: Fig 3E
dpa	tph+ neuron number
	replicate 1	replicate 2	replicate 3	replicate 4
0	428	282
1	364	430	553
2	393	435
3	384	346
4	379	336	413
5	269	307
6	371	314	347
7	332	416	571
8	633	343	364
9	528	523	632
10	675	597	597
11	531	663	532
12	649	816	823	855
13	910	939	911	1097
14	931	1010

## Sheet: Fig 3F
dpa	gad+ neuron number				tbh+ neuron number				th+ neuron number
	replicate 1	replicate 2	replicate 3	replicate 4	replicate 1	replicate 2	replicate 3	replicate 4	replicate 1	replicate 2	replicate 3	replicate 4
0	0	0	0	0	0	0	0	0	0	0	0	0
1	0	0	0	0	0	0	0	0	0	0	0	0
2	0	0	0	0	0	0	0	0	0	0	0	0
3	2	0	0	0	26	41	37	47	0	12	0
4	25	23	19	14	58	43	66	50	39	27	26	31
5	31	9			52	74	72	64	37	31	34
6	18	32			79	88	65	76	32	49	52	42
7	45	25	26		83	54	60	62	43	50	53	60
8	25	24			78	81	101		55	55	52
9	29	27	37	37	91	92	98		86	54	58
10	56	45	49		119	97	109	110	64	71	81	69
11	35	43	33		143	141	146		66	86	91	74
12	41	45	49	45	135	156	133	144	67	92	80	91
13	39	42	58	48	167	123	122	138	78	80	78	63
14	35	30	49	57	134	152	115		78	82	86	65

## Sheet: Fig 3H
GABAergic neuron number	dorsal	ventral
0	0	0
0	0	0
0	0	0
0	0	0
0	0	0
0	0	0
0	0	0
0	0	0
0	0	0
0	0	0
0	0	0
0	0	0
11	6	5
14	10	4
16	13	3
18	15	3
18	13	5
19	15	4
23	17	9
24	16	8
25	18	7
25	17	8
26	18	8
27	22	5
29	19	10
30	21	9
31	28	3
32	21	11
33	15	8
35	24	11
35	17	8
37	27	10
37	27	10
39	30	9
41	29	12
42	32	10
43	30	13
45	33	12
45	34	11
45	34	11
45	32	13
48	35	13
49	37	12
49	34	15
49	34	15
49	36	16
56	39	17
57	42	15
58	47	11

## Sheet: Fig 3J
tbh number	branch	Inside brain
26	2	24
37	5	32
41	2	39
43	5	38
47	2	45
50	7	43
52	10	42
54	4	49
58	7	51
60	5	55
62	5	57
63	9	54
64	9	55
65	10	55
66	4	62
72	10	62
74	9	65
76	10	66
78	10	77
79	12	67
81	10	71
83	11	72
88	9	79
91	11	80
92	11	81
97	12	85
98	9	89
101	8	93
109	10	99
110	12	98
115	13	102
119	9	110
122	12	110
123	13	110
133	11	122
134	12	122
135	12	123
141	12	129
143	13	130
144	12	132
146	14	132
152	14	128
156	12	142
167	10	157

## Sheet: Fig 3K
tph+ neuron%		tbh+ neuron%		gad+ neuron%		chat+ neuron%		th+ neuron%
regeneration	homeostasis	regeneration	homeostasis	regeneration	homoeostasis	regeneration	homoeostasis	regeneration	homeostasis
0.00277735	0.00189409	0.000368664	0.00104144	0.000137811	0.000305409	0.096098	0.0729103	0.000172926	0.000548324
0.00266141	0.00236491	0.000357049	0.0010252	0.000150021	0.000251983	0.0751487	0.0770317	0.000215697	0.000449347
0.00251781	0.00178031	0.000289075	0.00106948	0.00015284	0.000293704	0.0931474	0.0784237	0.000205322	0.000383699
