# Supplementary material for: 3D reconstruction of neuronal allometry and neuromuscular projections in asexual planarians using expansion tiling light sheet microscopy
Source: eLife journal article supplement (doi:10.7554/elife.101103), 2024-10-22
Supplement: fig3-figsupp1-data1 [file elife-101103-fig3-figsupp1-data1-v1.zip]

## Sheet: Fig S4B
regeneration				homeostasis
cube root of volume μm	square root of surface area μm			cube root of volume μm	square root of surface area μm
833.2	2145.71			550.685	1361.27
930.119	2310.58			502.803	1312.42
799.368	2042.41			671.81	1807.02
834.318	2064.27			564.439	1468.03
953.776	2466.1			605.966	1714.29
787.011	2587.25			780.684	2194.61
862.402	2226.01			795.701	2103.45
837.656	2140			929.219	2512.01
795.701	2040.41			931.912	2436.12
898.501	2317.63			1120.39	2871.39
817.217	1997.96			959.721	2629.5
909.912	2299.96			1221.28	3404.68
784.492	1944.12			1229.05	3307.38
1031.82	2638.8			1060.24	3319.7
863.446	2155.2			1315.02	4070.8
947.755	2441.14			445.855	1099.16
910.85	2298.18			460.98	1160.58
1084.58	2777.46			447.025	1087.97
783.227	2213.13			602.773	1554.45
752.92	2026.36			568.557	1598.47
936.367	2573.02			520.041	1439.95
828.696	2097.62			586.504	1484.61
1057.47	3142.86			565.656	1454.06
1039.79	2829.87			758.367	1979.49
985.205	2529.82			712.376	1770.51
913.653	2376.76			789.513	2124.68
890.73	2328.18			921.959	2359.52
1232.13	3356.38			830.954	2218.66
1130.83	2955.45			1002.52	2580.93
979.566	2602.98			879.818	2336.93
1162.17	3557.11			1487.09	4370.59
1037.63	2655.76			615.348	1606.11
1050.47	2707.51			573.8	1434.27
				644.908	1658.62
				913.653	2387.04
				953.776	2730.03
				695.109	1880.08
				759.716	2044.41
				1212.35	3295.02
				633.491	1784.29
				1111.03	2996.6
				1356.42	3969.27
				1266.01	3822.6
				882.821	2409.17
				1198.44	3757.98

## Sheet: Fig S4C
dpa	replicate 1	replicate 2	replicate 3	replicate 4
0	0	0	0
1	0	0	0
2	4.13637e+06	8.44324e+06	1.28934e+07	1.48082e+07
3	1.18315e+07	1.38985e+07	2.97906e+07
4	2.21805e+07	2.05496e+07	4.04291e+07
5	2.70475e+07	2.71719e+07	2.86383e+07
7	4.97336e+07	3.60922e+07
8	5.35224e+07	5.33663e+07	6.2772e+07
9	6.08737e+07	4.96886e+07	6.18561e+07
10	6.0614e+07
11	6.18723e+07	4.48729e+07
12	4.07836e+07	5.96187e+07	5.74412e+07
13	7.16088e+07	4.36398e+07	5.45894e+07
14	6.07e+07	6.15759e+07	9.07189e+07

## Sheet: Fig S4E
tbh+ neuron number	brain lobe angle
26	46.06
37	49.03
41	39.37
43	34.96
47	36.58
50	28.14
52	40.78
54	33.7
58	46.31
60	59.39
62	27.98
63	38.37
64	31.43
65	22.44
66	30.93
72	33.64
74	25.87
76	34.1
78	32.91
79	25.15
81	29.01
83	28.3
88	22.79
91	31.37
92	23.77
97	16.88
98	19.36
101	21.34
109	20.3
110	26.27
115	14.2
119	23.33
122	16.21
123	17.24
133	16
134	15.79
135	17.87
138	14.39
141	21.15
143	19.84
144	17.06
146	20.75
152	11.54
156	19.52
167	22.48
