# Supplementary material for: 3D reconstruction of neuronal allometry and neuromuscular projections in asexual planarians using expansion tiling light sheet microscopy
Source: eLife journal article supplement (doi:10.7554/elife.101103), 2024-10-22
Supplement: fig4-data1 [file elife-101103-fig4-data1-v1.zip]

## Sheet: Fig 4C
position	circular fiber				longitudinal fiber				diagonal fiber
	replicate 1	replicate 2	replicate 3	replicate 4	replicate 1	replicate 2	replicate 3	replicate 4	replicate 1	replicate 2	replicate 3	replicate 4
v1	0.4545	0.4063	0.4286	0.3793	0.303	0.2813	0.4286	0.3793	0.2424	0.3125	0.1429	0.2414
d1	0.4815	0.4242	0.5	0.5	0.2593	0.2727	0.2333	0.1071	0.2593	0.303	0.2667	0.3929
v2	0.3824	0.4571	0.3448	0.3438	0.2353	0.1714	0.3448	0.4063	0.3824	0.3714	0.3103	0.25
d2	0.5	0.55	0.5	0.4667	0.1818	0.2	0.2	0.2667	0.3182	0.25	0.3	0.2667
v3	0.2	0.2353	0.2857	0.1707	0.48	0.4412	0.3714	41.46	0.32	0.3235	0.3429	0.4146
d3	0.4516	0.68	0.6154	0.6333	0.2581	0.16	0.2308	0.1333	0.2903	0.16	0.1538	0.2333
