# Supplementary material for: 3D reconstruction of neuronal allometry and neuromuscular projections in asexual planarians using expansion tiling light sheet microscopy
Source: eLife journal article supplement (doi:10.7554/elife.101103), 2024-10-22
Supplement: fig6-data1 [file elife-101103-fig6-data1-v1.zip]

## Sheet: Fig 6C
position	circular fiber			longitudinal fiber			diagonal fiber
	replicate 1	replicate 2	replicate 3	replicate 1	replicate 2	replicate 3	replicate 1	replicate 2	replicate 3
egfp-v	0.4063	0.4286	0.3793	0.2813	0.4286	0.3793	0.3125	0.1429	0.2414
catenin-v	0.5135	0.5	0.4118	0.2703	0.1786	0.3235	0.2162	0.3214	0.2647
inr1-v	0.5385	0.6364	0.5484	0.2692	0.2424	0.1935	0.1923	0.1212	0.2581
egfp-d	0.4815	0.4242	0.4516	0.2593	0.2727	0.1935	0.2593	0.303	0.3548
catenin-d	0.3448	0.3214	0.3913	0.3793	0.4286	0.3913	0.2759	0.25	0.2174
inr1-d	0.6857	0.6053	0.6389	0.1714	0.2105	0.1944	0.1842	0.1667	0.2162
