# Supplementary material for: 3D reconstruction of neuronal allometry and neuromuscular projections in asexual planarians using expansion tiling light sheet microscopy
Source: eLife journal article supplement (doi:10.7554/elife.101103), 2024-10-22
Supplement: fig6-figsupp1-data1 [file elife-101103-fig6-figsupp1-data1-v1.zip]

## Sheet: inr-1
length(mm)	width
3.595	0.404
4.237	0.501
3.443	0.507
3.13	0.517
3.587	0.538
4.17	0.546
3.076	0.465
4.055	0.385
3.257	0.612
2.801	0.554
2.419	0.298
3.834	0.638
2.888	0.401
2.977	0.507
2.544	0.437
2.666	0.41
2.698	0.453
3.107	0.433
3.357	0.498
3.742	0.346
4.2	0.549
4.188	0.633
4.428	0.526
3.324	0.545
3.74	0.441
3.388	0.632
2.919	0.475
3.376	0.442
3.267	0.538
2.581	0.351
2.787	0.396
3.301	0.531
2.846	0.412
4.19	0.52
3.253	0.613
3.316	0.48
4.1	0.417
3.255	0.451
3.871	0.537
3.258	0.556

## Sheet: egfp
length	width
3.034	0.713
2.768	0.84
2.17	0.536
3.685	0.872
3.427	0.915
2.585	0.746
3.146	0.683
2.657	0.63
3.871	0.879
3.217	0.825
2.486	0.622
3.365	0.695
2.954	0.688
3.243	0.754
3.307	0.75
3.024	0.568
2.751	0.757
3.077	0.657
2.961	0.651
2.489	0.686
2.55	0.696
2.949	0.62
2.63	0.541
2.164	0.53
3.116	0.553
2.799	0.645
3.318	0.683
2.579	0.614
3.038	0.667
2.914	0.659
2.439	0.639
3.489	0.745
3.343	0.672
2.231	0.623
2.261	0.496
3.291	0.644
2.08	0.535
2.243	0.522
2.598	0.552
2.529	0.502
